# Supplementary material for: Time-resolved IR studies of cyclic enone triplet excited states and their reactions with alkenes
Source: Royal Society of Chemistry journal article supplement (doi:10.1039/b209805a), 2003-01-22
Supplement: tables.pdf [file tables.pdf]

**Supporting Information for**  
**Time-Resolved IR Studies of Cyclic Enone Triplet Excited States and their**  
**Reactions with Alkenes**

Andrew D. Cohen, Brett M. Showalter, Daniel E. Brady, Craig A. Kenesky,  
and John P. Toscano\*

**Table S-1.** Optimized geometry of 3-phenyl-2-cyclohexenone (**1**)

Theory: B3LYP/6-31G\*

Energy with zero point correction (Hartrees): -539.515601

Cartesian Coordinates:

| Atomic<br>Number | Coordinates (Angstroms) |           |           |
|------------------|-------------------------|-----------|-----------|
|                  | X                       | Y         | Z         |
| 1                | -0.381824               | 1.118545  | 4.141513  |
| 6                | 0.937561                | 0.831129  | 2.484146  |
| 8                | 1.968863                | 0.97042   | 3.129153  |
| 6                | 0.964733                | 0.325555  | 1.099593  |
| 6                | -0.140596               | 0.142733  | 0.336718  |
| 1                | 1.960657                | 0.141318  | 0.706625  |
| 6                | -1.516678               | 0.449427  | 0.902367  |
| 6                | -0.048919               | -0.332109 | -1.06427  |
| 6                | -1.549893               | 0.374739  | 2.434293  |
| 1                | -2.252616               | -0.241272 | 0.475179  |
| 1                | -1.821996               | 1.456889  | 0.577101  |
| 6                | -0.424667               | 1.210754  | 3.051907  |
| 1                | -2.526395               | 0.708608  | 2.803883  |
| 1                | -1.43513                | -0.673019 | 2.742035  |
| 1                | -0.586408               | 2.276949  | 2.82841   |
| 6                | 0.126931                | -1.204784 | -3.742514 |
| 6                | 1.015999                | -1.146682 | -1.493503 |
| 6                | -1.031458               | 0.019467  | -2.008131 |
| 6                | -0.939936               | -0.404236 | -3.333079 |
| 6                | 1.102395                | -1.577386 | -2.814447 |
| 1                | 1.766431                | -1.467503 | -0.777714 |
| 1                | -1.865352               | 0.648303  | -1.711512 |
| 1                | -1.705079               | -0.108147 | -4.045696 |
| 1                | 1.929198                | -2.213695 | -3.118379 |
| 1                | 0.194776                | -1.541983 | -4.773144 |

**Table S-2.** Optimized geometry of the triplet excited state of 3-phenyl-2-cyclohexenone (**1**)

Theory: B3LYP/6-31G\*

Energy with zero point correction (Hartrees) = -539.433254

 $\langle S^2 \rangle = 2.04$ 

Cartesian Coordinates:

| Atomic<br>Number | Coordinates (Angstroms) |           |           |
|------------------|-------------------------|-----------|-----------|
|                  | X                       | Y         | Z         |
| 6                | 3.187721                | 0.529955  | 0.387185  |
| 6                | 2.616713                | -0.832962 | -0.005092 |
| 8                | 3.369365                | -1.827868 | -0.094860 |
| 6                | 1.237582                | -0.931678 | -0.363473 |
| 6                | 0.310586                | 0.223793  | -0.378389 |
| 1                | 0.924041                | -1.904949 | -0.729951 |
| 6                | -1.073293               | 0.056777  | -0.168249 |
| 6                | 1.021172                | 1.546964  | -0.486574 |
| 1                | 0.340122                | 2.393983  | -0.380863 |
| 1                | 1.495343                | 1.642757  | -1.477311 |
| 1                | 1.659410                | 1.509603  | 1.581240  |
| 1                | 3.879755                | 0.820527  | -0.415742 |
| 1                | 3.806197                | 0.397015  | 1.282178  |
| 6                | 2.126435                | 1.619007  | 0.594360  |
| 1                | 2.598082                | 2.608806  | 0.575217  |
| 6                | -3.876036               | -0.318349 | 0.234315  |
| 6                | -2.000302               | 1.155438  | -0.202032 |
| 6                | -1.641749               | -1.241743 | 0.083356  |
| 6                | -3.000018               | -1.412754 | 0.281711  |
| 6                | -3.354555               | 0.964465  | -0.012612 |
| 1                | -1.635901               | 2.158055  | -0.395212 |
| 1                | -0.991211               | -2.107674 | 0.130653  |
| 1                | -3.389373               | -2.409240 | 0.473625  |
| 1                | -4.024483               | 1.819487  | -0.054857 |
| 1                | -4.942440               | -0.458906 | 0.382864  |

**Table S-3.** B3LYP/6-31G\* calculated IR frequencies<sup>a</sup> (cm<sup>-1</sup>) and intensities (in parentheses) for 3-phenyl-2-cyclohexenone (**1**)

| Singlet    | <sup>18</sup> O-Labeled Singlet | Triplet   | <sup>18</sup> O-Labeled Triplet |
|------------|---------------------------------|-----------|---------------------------------|
| 3087 (11)  | 3087 (11)                       | 3097 (7)  | 3097 (7)                        |
| 3083 (26)  | 3083 (26)                       | 3093 (24) | 3093 (24)                       |
| 3076 (15)  | 3076 (15)                       | 3082 (32) | 3082 (32)                       |
| 3072 (13)  | 3072 (13)                       | 3073 (2)  | 3073 (2)                        |
| 3064 (7)   | 3064 (7)                        | 3062 (14) | 3062 (14)                       |
| 3057 (2)   | 3057 (2)                        | 3057 (6)  | 3057 (6)                        |
| 2987 (21)  | 2987 (21)                       | 3000 (15) | 3000 (15)                       |
| 2966 (39)  | 2966 (39)                       | 2973 (27) | 2973 (27)                       |
| 2959 (27)  | 2959 (27)                       | 2962 (32) | 2962 (32)                       |
| 2924 (34)  | 2924 (34)                       | 2926 (31) | 2926 (31)                       |
| 2900 (11)  | 2900 (11)                       | 2919 (19) | 2919 (19)                       |
| 2888 (15)  | 2888 (15)                       | 2875 (26) | 2875 (26)                       |
| 1697 (299) | 1664 (301)                      | 1541 (11) | 1541 (10)                       |
| 1601 (48)  | 1600 (35)                       | 1512 (5)  | 1512 (5)                        |
| 1592 (20)  | 1592 (19)                       | 1479 (1)  | 1478 (0)                        |
| 1566 (17)  | 1566 (15)                       | 1463 (8)  | 1463 (5)                        |
| 1484 (5)   | 1484 (5)                        | 1446 (23) | 1446 (7)                        |
| 1465 (3)   | 1465 (3)                        | 1442 (30) | 1434 (4)                        |
| 1449 (6)   | 1449 (6)                        | 1432 (6)  | 1419 (39)                       |
| 1434 (9)   | 1434 (9)                        | 1415 (0)  | 1415 (3)                        |
| 1430 (9)   | 1430 (9)                        | 1410 (17) | 1410 (22)                       |
| 1352 (2)   | 1352 (2)                        | 1335 (5)  | 1335 (5)                        |
| 1337 (31)  | 1337 (30)                       | 1316 (3)  | 1316 (3)                        |
| 1317 (1)   | 1317 (1)                        | 1308 (1)  | 1307 (1)                        |
| 1314 (21)  | 1313 (24)                       | 1299 (2)  | 1299 (3)                        |
| 1304 (25)  | 1303 (22)                       | 1284 (10) | 1284 (9)                        |
| 1266 (14)  | 1265 (13)                       | 1267 (7)  | 1267 (7)                        |
| 1242 (4)   | 1241 (4)                        | 1230 (3)  | 1230 (3)                        |
| 1233 (96)  | 1232 (96)                       | 1224 (32) | 1222 (29)                       |
| 1214 (9)   | 1213 (10)                       | 1186 (29) | 1184 (32)                       |
| 1174 (8)   | 1174 (8)                        | 1172 (5)  | 1171 (6)                        |
| 1170 (50)  | 1170 (50)                       | 1146 (7)  | 1146 (6)                        |
| 1148 (0)   | 1148 (0)                        | 1134 (2)  | 1134 (2)                        |
| 1120 (19)  | 1120 (19)                       | 1117 (4)  | 1117 (4)                        |
| 1074 (4)   | 1074 (4)                        | 1068 (4)  | 1068 (4)                        |
| 1044 (1)   | 1043 (1)                        | 1021 (2)  | 1021 (2)                        |
| 1033 (0)   | 1033 (0)                        | 1016 (2)  | 1016 (2)                        |
| 1021 (2)   | 1021 (2)                        | 999 (0)   | 999 (0)                         |
| 977 (0)    | 977 (0)                         | 956 (2)   | 956 (2)                         |
| 966 (6)    | 965 (7)                         | 942 (0)   | 942 (0)                         |
| 960 (0)    | 960 (0)                         | 936 (38)  | 934 (38)                        |
| 933 (7)    | 933 (2)                         | 920 (0)   | 920 (0)                         |

**Table S-3.** (continued)

| Singlet  | <sup>18</sup> O-Labeled Singlet | Triplet  | <sup>18</sup> O-Labeled Triplet |
|----------|---------------------------------|----------|---------------------------------|
| 933 (6)  | 933 (11)                        | 904 (8)  | 904 (8)                         |
| 904 (1)  | 904 (1)                         | 860 (7)  | 859 (8)                         |
| 890 (16) | 890 (16)                        | 841 (5)  | 841 (5)                         |
| 872 (1)  | 871 (1)                         | 832 (2)  | 832 (2)                         |
| 843 (1)  | 843 (1)                         | 787 (4)  | 786 (4)                         |
| 825 (1)  | 825 (1)                         | 773 (0)  | 772 (0)                         |
| 796 (1)  | 794 (1)                         | 741 (18) | 741 (18)                        |
| 746 (34) | 746 (34)                        | 723 (33) | 723 (33)                        |
| 734 (5)  | 733 (5)                         | 703 (1)  | 703 (1)                         |
| 681 (22) | 681 (22)                        | 643 (26) | 643 (26)                        |
| 646 (3)  | 643 (3)                         | 617 (11) | 614 (10)                        |
| 609 (0)  | 609 (0)                         | 595 (0)  | 595 (0)                         |
| 593 (1)  | 591 (0)                         | 510 (1)  | 507 (1)                         |
| 560 (2)  | 560 (2)                         | 500 (9)  | 497 (10)                        |
| 500 (10) | 493 (8)                         | 478 (13) | 474 (11)                        |
| 462 (2)  | 460 (3)                         | 449 (8)  | 447 (9)                         |
| 458 (3)  | 453 (2)                         | 421 (2)  | 418 (2)                         |
| 414 (5)  | 412 (5)                         | 392 (1)  | 392 (1)                         |
| 399 (0)  | 399 (0)                         | 375 (7)  | 375 (7)                         |
| 335 (5)  | 332 (6)                         | 361 (3)  | 356 (3)                         |
| 279 (1)  | 277 (1)                         | 293 (1)  | 291 (1)                         |
| 246 (1)  | 246 (1)                         | 237 (1)  | 236 (1)                         |
| 213 (2)  | 212 (2)                         | 178 (2)  | 177 (2)                         |
| 122 (2)  | 120 (2)                         | 131 (1)  | 130 (1)                         |
| 112 (1)  | 111 (1)                         | 102 (2)  | 100 (2)                         |
| 77 (0)   | 77 (0)                          | 60 (1)   | 59 (1)                          |
| 50 (1)   | 49 (1)                          | 35 (0)   | 35 (0)                          |

<sup>a</sup>Scaled by 0.96

**Table S-4.** Optimized geometry of 3-phenyl-2-cyclopentenone (**2**)

Theory: B3LYP/6-31G\*

Energy with zero point correction (Hartrees): -500.231971

Cartesian Coordinates:

| Atomic<br>Number | Coordinates (Angstroms) |           |           |
|------------------|-------------------------|-----------|-----------|
|                  | X                       | Y         | Z         |
| 6                | 2.819547                | 1.098812  | 0.000059  |
| 6                | 1.318245                | 1.440100  | -0.000032 |
| 6                | 0.604413                | 0.093097  | -0.000013 |
| 6                | 1.494535                | -0.927203 | 0.000021  |
| 6                | 2.882053                | -0.436011 | 0.000040  |
| 8                | 3.899013                | -1.107217 | -0.000077 |
| 6                | -0.862533               | -0.005242 | -0.000003 |
| 6                | -1.657712               | 1.155387  | -0.000013 |
| 6                | -3.049443               | 1.074393  | -0.000008 |
| 6                | -3.678815               | -0.170228 | 0.000000  |
| 6                | -2.904627               | -1.334647 | 0.000006  |
| 6                | -1.516601               | -1.253510 | 0.000011  |
| 1                | 3.346745                | 1.484010  | 0.879380  |
| 1                | 3.346934                | 1.484208  | -0.879077 |
| 1                | 1.027072                | 2.030792  | -0.877851 |
| 1                | 1.027006                | 2.030897  | 0.877681  |
| 1                | 1.273768                | -1.988257 | 0.000090  |
| 1                | -1.185660               | 2.132571  | -0.000028 |
| 1                | -3.641304               | 1.985608  | -0.000008 |
| 1                | -4.763374               | -0.235341 | 0.000001  |
| 1                | -3.386157               | -2.308688 | 0.000008  |
| 1                | -0.931500               | -2.167752 | 0.000023  |

**Table S-5.** Optimized geometry of the triplet excited state of 3-phenyl-2-cyclopentenone (2)

Theory: B3LYP/6-31G\*

Energy with zero point correction (Hartrees) = -500.144688

 $S^2 = \langle 2.04 \rangle$ 

Cartesian Coordinates:

| Atomic<br>Number | Coordinates (Angstroms) |           |           |
|------------------|-------------------------|-----------|-----------|
|                  | X                       | Y         | Z         |
| 6                | 2.816898                | 1.089360  | 0.092321  |
| 6                | 1.322679                | 1.473229  | -0.053045 |
| 6                | 0.545509                | 0.164182  | -0.037087 |
| 6                | 1.525180                | -0.937098 | -0.051466 |
| 6                | 2.862983                | -0.443333 | 0.006838  |
| 8                | 3.900058                | -1.129178 | 0.000072  |
| 6                | -0.835924               | 0.032743  | -0.015666 |
| 6                | -1.487621               | -1.261127 | 0.006737  |
| 6                | -2.861905               | -1.369421 | 0.026962  |
| 6                | -3.676860               | -0.221569 | 0.025078  |
| 6                | -3.073549               | 1.056278  | 0.002731  |
| 6                | -1.705010               | 1.190457  | -0.016290 |
| 1                | 3.236155                | 1.404644  | 1.055334  |
| 1                | 3.451977                | 1.527365  | -0.684451 |
| 1                | 1.145233                | 2.012936  | -0.994536 |
| 1                | 0.992638                | 2.146602  | 0.747804  |
| 1                | 1.299443                | -1.994796 | -0.106578 |
| 1                | -0.880458               | -2.159705 | 0.009699  |
| 1                | -3.320954               | -2.354452 | 0.044212  |
| 1                | -4.758232               | -0.315901 | 0.039965  |
| 1                | -3.700312               | 1.944337  | 0.000330  |
| 1                | -1.260230               | 2.180189  | -0.035039 |

**Table S-6.** B3LYP/6-31G\* calculated IR frequencies<sup>a</sup> (cm<sup>-1</sup>) and intensities (in parentheses) for 3-phenyl-2-cyclopentenone (**2**)

| Singlet    | <sup>18</sup> O-Labeled Singlet | Triplet   | <sup>18</sup> O-Labeled Triplet |
|------------|---------------------------------|-----------|---------------------------------|
| 3111 (6)   | 3111 (6)                        | 3123 (8)  | 3123 (8)                        |
| 3089 (7)   | 3089 (7)                        | 3092 (13) | 3092 (13)                       |
| 3085 (22)  | 3085 (22)                       | 3087 (25) | 3087 (25)                       |
| 3077 (24)  | 3077 (24)                       | 3082 (15) | 3082 (15)                       |
| 3066 (7)   | 3066 (7)                        | 3063 (11) | 3063 (11)                       |
| 3058 (1)   | 3058 (1)                        | 3058 (6)  | 3058 (6)                        |
| 2993 (12)  | 2993 (12)                       | 2986 (16) | 2986 (16)                       |
| 2955 (14)  | 2955 (14)                       | 2947 (26) | 2947 (26)                       |
| 2952 (10)  | 2952 (10)                       | 2936 (12) | 2936 (12)                       |
| 2924 (23)  | 2924 (23)                       | 2902 (16) | 2902 (16)                       |
| 1731 (420) | 1698 (408)                      | 1557 (3)  | 1555 (2)                        |
| 1596 (3)   | 1596 (2)                        | 1519 (46) | 1519 (44)                       |
| 1590 (89)  | 1590 (88)                       | 1499 (16) | 1499 (15)                       |
| 1565 (37)  | 1565 (35)                       | 1464 (45) | 1453 (5)                        |
| 1486 (7)   | 1486 (7)                        | 1453 (5)  | 1440 (42)                       |
| 1457 (7)   | 1457 (7)                        | 1432 (1)  | 1432 (3)                        |
| 1435 (17)  | 1435 (17)                       | 1415 (1)  | 1415 (0)                        |
| 1425 (4)   | 1425 (4)                        | 1395 (6)  | 1395 (6)                        |
| 1323 (8)   | 1323 (8)                        | 1312 (0)  | 1312 (0)                        |
| 1311 (25)  | 1311 (24)                       | 1291 (34) | 1291 (33)                       |
| 1285 (6)   | 1285 (6)                        | 1280 (12) | 1279 (12)                       |
| 1249 (76)  | 1248 (75)                       | 1256 (4)  | 1254 (4)                        |
| 1238 (5)   | 1236 (4)                        | 1232 (12) | 1232 (12)                       |
| 1207 (1)   | 1207 (1)                        | 1206 (11) | 1206 (10)                       |
| 1202 (1)   | 1202 (1)                        | 1180 (20) | 1179 (13)                       |
| 1175 (24)  | 1175 (23)                       | 1170 (73) | 1168 (79)                       |
| 1159 (102) | 1158 (101)                      | 1138 (20) | 1138 (20)                       |
| 1147 (11)  | 1147 (12)                       | 1116 (14) | 1116 (14)                       |
| 1128 (0)   | 1128 (0)                        | 1108 (1)  | 1108 (1)                        |
| 1073 (4)   | 1073 (4)                        | 1058 (13) | 1058 (14)                       |
| 1020 (3)   | 1020 (3)                        | 983 (0)   | 983 (0)                         |
| 989 (5)    | 988 (5)                         | 974 (6)   | 973 (6)                         |
| 987 (3)    | 987 (3)                         | 952 (0)   | 952 (0)                         |
| 977 (1)    | 977 (1)                         | 946 (2)   | 946 (2)                         |
| 960 (0)    | 960 (0)                         | 939 (1)   | 938 (1)                         |
| 942 (0)    | 942 (0)                         | 919 (0)   | 919 (0)                         |
| 930 (0)    | 930 (0)                         | 863 (25)  | 863 (26)                        |
| 899 (0)    | 899 (0)                         | 845 (8)   | 844 (8)                         |
| 860 (16)   | 860 (16)                        | 824 (3)   | 824 (4)                         |
| 835 (5)    | 833 (5)                         | 793 (5)   | 793 (5)                         |
| 818 (0)    | 818 (0)                         | 777 (3)   | 776 (3)                         |

**Table S-6.** (continued)

| Singlet  | <sup>18</sup> O-Labeled Singlet | Triplet  | <sup>18</sup> O-Labeled Triplet |
|----------|---------------------------------|----------|---------------------------------|
| 811 (0)  | 811 (0)                         | 757 (0)  | 757 (0)                         |
| 806 (6)  | 806 (7)                         | 726 (33) | 726 (33)                        |
| 749 (43) | 749 (43)                        | 685 (11) | 684 (11)                        |
| 674 (22) | 674 (22)                        | 627 (26) | 627 (26)                        |
| 640 (1)  | 640 (1)                         | 619 (5)  | 618 (4)                         |
| 617 (5)  | 612 (2)                         | 602 (15) | 594 (13)                        |
| 603 (4)  | 596 (8)                         | 584 (2)  | 581 (6)                         |
| 553 (1)  | 553 (1)                         | 480 (7)  | 474 (5)                         |
| 519 (0)  | 517 (0)                         | 472 (0)  | 472 (2)                         |
| 491 (5)  | 483 (4)                         | 423 (5)  | 422 (5)                         |
| 405 (3)  | 405 (3)                         | 390 (0)  | 390 (0)                         |
| 394 (0)  | 394 (0)                         | 370 (4)  | 366 (4)                         |
| 367 (8)  | 364 (8)                         | 318 (5)  | 317 (5)                         |
| 308 (0)  | 305 (0)                         | 302 (1)  | 299 (1)                         |
| 190 (2)  | 189 (2)                         | 165 (3)  | 164 (3)                         |
| 144 (2)  | 142 (2)                         | 136 (1)  | 135 (1)                         |
| 109 (1)  | 109 (1)                         | 110 (0)  | 110 (0)                         |
| 82 (0)   | 82 (0)                          | 67 (2)   | 66 (2)                          |
| 16 (1)   | 16 (1)                          | 27 (0)   | 27 (0)                          |

<sup>a</sup>Scaled by 0.96
